# Supplementary material for: Integrative metagenomic and biochemical studies on rifamycin ADP-ribosyltransferases discovered in the sediment microbiome
Source: PubMed Central journal article supplement (PMC6092378; doi:10.1038/s41598-018-30547-x), 2018-08-14
Supplement: 41598_2018_30547_MOESM1_ESM.pdf [file 41598_2018_30547_MOESM1_ESM.pdf]

**Additional file 1: Scheme S1, Table S1–S9, and Figures S1–S8**

**Integrative metagenomic and biochemical studies on rifamycin  
ADP-ribosyltransferases discovered in the sediment microbiome**

Jae Hong Shin<sup>1,†</sup>, Hyunuk Eom<sup>2,†</sup>, Woon Ju Song<sup>2,\*</sup>, Mina Rho<sup>1,3,\*</sup>

<sup>1</sup>Department of Computer Science and Engineering, Hanyang University, Seoul, Korea

<sup>2</sup>Department of Chemistry, Seoul National University, 1 Gwanak-ro, Gwanak-gu, Seoul, 08826, Korea

<sup>3</sup>Department of Biomedical Informatics, Hanyang University, Seoul, Korea

<sup>†</sup>These authors contributed equally to this work.

\*Corresponding authors: [woonjusong@snu.ac.kr](mailto:woonjusong@snu.ac.kr), [minarho@hanyang.ac.kr](mailto:minarho@hanyang.ac.kr)

**Scheme S1.** Reaction of mono-ADP-ribosyltransferase (a) ADP-ribosylation of rifampin. (b) Uncoupled reaction of NAD<sup>+</sup> consumption.

(a)

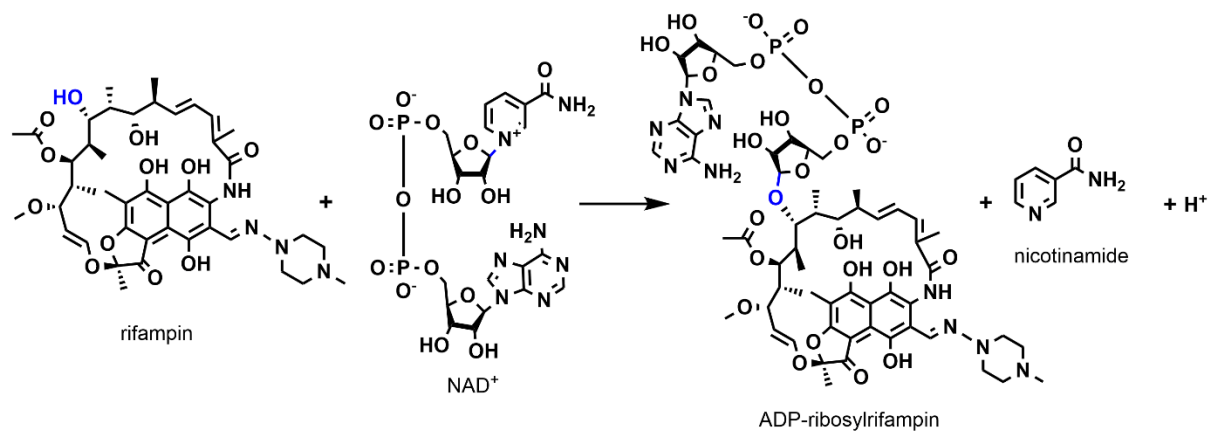

(b)

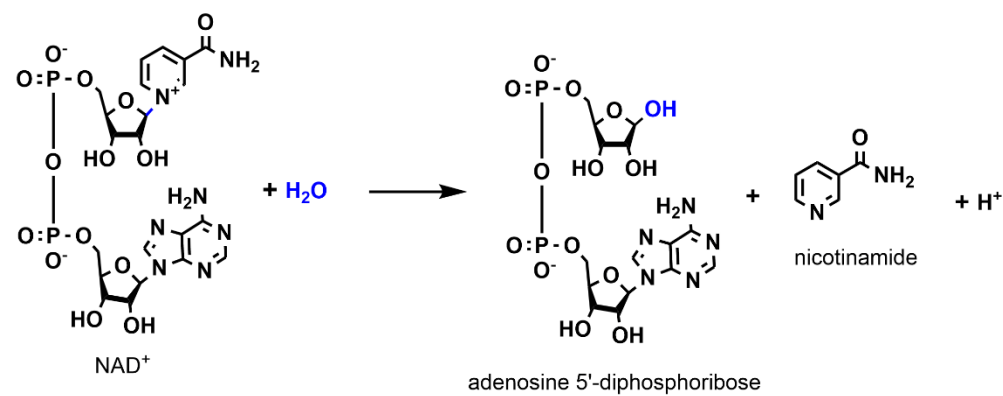

**Table S1.** A total of 45 rifamycin ADP-ribosyl transferase (*arr*) homologous genes obtained from the sediment microbiome

**Table S2.** Protein sequence similarity between 45 newly identified *arr* genes and the genes in the complete genomes

**Table S3.** The list of nucleotide and amino acid sequences of four representative Arr-wd proteins involved in rifamycin-resistance

**Table S4.** Primer sequences used for the current work.

**Table S5.** ADP-ribosylated product analysis by ESI-MS.

**Table S6.** Steady-state kinetic parameters of Arr-wd proteins in ADP-ribosylation of rifampin and its analogues.

**Table S7.** Substrate dissociation constants ( $K_D$ ) measured from the intrinsic fluorescence quenching.

**Table S8.** Steady-state kinetic parameters of Arr-wd3 variants in ADP-ribosylation of rifampin analogues.

**Table S9.** Determination of minimum inhibitory concentration (MIC) of rifampin and its analogues.

**Table S1.** A total of 45 rifamycin ADP-ribosyl transferase (arr) homologous genes obtained from the sediment microbiome.

>W2\_1488688  
DGIVGPFHGHADLSPGDLIAPGYPSHYGARKLASWVYMTRIVAGAVLAAEIAAGEGRARVYLVEPTGPFEDDPNVTDKKFP  
GNPTQSYRTKDPLRVLEEVLWDWAPTPAERLAQLRDFVERTREGIEAID

>W2\_1852679  
EFSPNNFVVKLCIQGMALEDEGKPEEADKIFLQAWDEAANDFEKFTAAYYVARHQNNNSADKLKWLTVLEFGLKINDDTVKSA  
FPALYFNIAECYEDLGDENAKKNYELADSFHKHPSDKGPFYHGTRADLQVGDLLTAGGKSNYKAELTMNHIFTALVNGAGLA  
AALVGGDGRERVYIVEPTGSFENDPNVTDKKFPGNPTRSYRSEAPLEIVGEVTDWVKITPEELQKWREKLANNKGEIIN

>W2\_2666971  
EFSPNNNIVVKLCIQGMALEDEGNPEEASKLFLQAWNEAANDFEKFTAGYVARHQNNIADKLKWLTVLEFGLKINDDTVKSA  
FPGLYLNIAECYEDLGDVENAKKNYELADSFHKHPSDKGPFYHGTRADLQVGDLLTAGGKSNYKAELTMNHIFTALINGAGLA  
AALASGDGRERVYIVEPTGSFENDPNVTDKKFPGNPTRSYRSQAPLKIVGEATDWARITPEELQKWRKKLANSKGEIIN

>W2\_399810  
DENKEKNLNRQGATPFAQTYFHGTKANLKIGDLIEAGFNSNYGVRKNAKYIFLSATLDAAIWGAELAFGEGRERIYVEPTGQI  
EDDPLTDKKFPGNPSKSYRSTEPFRVVGVEGWSQRHPAEQVNTMKAHLEKLKAQGINSLNDE

>W2\_931432  
EFNPNNNIVVKLCIHGMSLEDGGKPEEASEIFLQAWNEAENDFEKYLAAYYAARHQKNAADKLQWLETALEFASKVNTDSAKS  
AFPSLYANIAKCYEDLGDSENAKKNHNDLADSFKNPSDKGPFYHGTRADLQVGDMLTAGGKSNYKAELVMNHIFTAINGA  
GLAAALANGDGRERVYIVEPTGSFENDPNVTDKKFPGNPTRSYRSQSPLKIVGELTDWARITPEQLREWREKLANSKGEIIN

>W2\_1076727  
EPEKSVPTSIQSPFAQTYFHGTKADLKIGDYIEAGYHSNYGQRKNARYIFLTATLDAAIWGAELAFGEGRERIYVEPTGPIEDDP  
DLTDKKLPGNPTKSYRSTHPFKVVGVEVTLWQGHVPAQVKAMKEGLAKLKEQGINSLNDE

>W2\_1252150  
EENNTTQTMRIFVQTYFHGTKADLKMGDIIETGITSNYGQRSNAKYIYLTATIDAAIWGAELAFGDGRERIYVEPTGPIEDD  
PNLTDKKFPGNPTKSYRSKHSFKVVGVEVTVWQRHSAEQVKAMKDHLQKLKDEGIEAIED

>W2\_493312  
TDRQSPCEGVYYHGTRADLKPGEELLRPGYGSNYTERASPWVYFSATLEAATWGAELARGDGPGRIVVEPTGAFVDDPNLTD  
KRFPGNPTKSYRSQEPRLRVVAEHVWGQGHTEPEAVAAMKAAISGLEPIDD

>W2\_1280285\_wd4  
EFSPNNNIVVKLCIQGMELEEKGKPEEASEIFLQAWNEAADDFEKFTAAYYVARHQNDTADKLKWLTVLEFGLKINDDTVKSA  
FPALYQNLAKCFEDLGDARNAKKNYELANSFKKPSDKGPFYHGTRADLQIGDLLTAGGKSNYKAELVMNHIFTALVNGAGL  
AAALANGDGRERVYIVEPTGSFENDPNVTDKKFPGNPTRSYRSQAPLKIVGEVTDWVRITPEELQKWREKLANSKGEIIN

>W2\_1524164  
TDQHPNFIQSYFHGTKSNLSVGDIVPGKDANYGERKAKFVYASSNLNVAIWGAELAVGDGPGRIVVEPMGTVENDPNLTD  
KKFPGNPTNSYRAQNGFKVVAEVDWQGHPPDEIKAAREKVDLKLNGAPIIED

>W2\_2157429  
NDKKDVLNDNGPFFHGTAKELKIGDLLEPQHLSNYQNKKSNIYFTATLNAKWGAELATSKSKERIYIVEPLGEFENDPNLTDKR  
FPGNPTRSYRSKSPKIIAELGWERHSDEEINHMISSLKKLSDEGKNVIYD

>W2\_1786964  
VLVYLQHYFTPLQKKGFCYIKLPTIKMEQYYHGTKAQLNIGELIEPGRSNGIRKKNFVYLTATLEAATWGAELASGDGPGRIV  
YIVEPTGSIEDDPNLTDKKFPGNPTKFSRSHALKIVGEVEQWEGHTNEQLDNMRAHLERLKASGIEAIEE

>W2\_1931402  
NSDESRAATPFAQTYFHGTRADLRVGERIEVGFASNFQRTNARYIFLTATLDAAIWGAELALGDGRERIYVEATGPVEDDPDLT  
DRKFPNPTMSYRSTHPFRVVGVEVGGWQGHPPSEQVQAMREALDKLNEQGVTSLNDQA

>W2\_611506  
PDRHPNFIQSYFHGTKANLRIGDLIVPGNSANYGERMAKYVYASSNLNVAIWASELAVGDGPGRIVVEPIGAIENDPNLTDKK  
YPGNPTNSFRAREGFKVVAEVKEWLGHSPEEIKAAAREKVDLALKNAPIIED

>W2\_2027090  
ENTTIDLSQIFYHGTKAELKTGDFIEPGYNSNYGKKKKAKYIYLTATLDAAIWGAELAAGEGRQRIYIVEPTGTIEDDPNLTDKKFP  
GNPTKSYRSMHPLKVIGEVSEWTGHSPEQLKAMKDHLAELERMGIEAIED

>W2\_1316525  
SSDQPRATPFAQTFHGTADLGLGLDIEVGFASNFGRRTNAKYIFLTSTLDAAIWGAELALGDGRERIYVEATGPVEDDPDLT  
DRKFPNPTMSYRSTHPFRVVGVEVWQGHPPPEQVSAMRDGLAKLKEQGVRSLE

>W2\_1614168

EFDPNNNVVKLCIQGMALEEKDKPEEAGKFLQAWNEAGDDFEKFLAAHFVARHQKNVDPKWKWLETALQFALKINNDVSKS  
AFPSLYSNIARCYEEMGDAANAKKNYESAVSFKDNPSPDKGPFYHGTRADLQIGELLTAGGRSNIKPELTMNHIFTALVNGAGL  
AAALAKGDGRERVYVEPTGSFENDPNVSDKKFPGNPNTRSYRSQSPLKIVGEVTDWVRQTPGQIQKWREKLADNKGKIIN  
>W2\_705194  
NQPTESDHHQGATPFVQTYFHGTKAALKIGALIEPGYHSNYGQHKATYIFLTATLDAAVWGAELSLGEGPERIYLVEPTGPIED  
DPDLTDKKFSGNPTKSYRSLYPFRVVEVASWQGHPEQVNMMDHLAKLKEKGINSLND  
>W2\_691914  
PDVPAASVAGGTRDAGRHRGPGASLNRTNVASDVRRAVRTHLLERDMDGDGSDPGPFHGTADLQVGDLLTAGFRSNIYR  
PDVLMNHVYFTALVGTAAALAAALAAAGDGRERVYVAPTGPFENDPNVTDKKFPGNPNTRSYRSQSPLTVVGEVADWVRLTPEE  
RAAWHERLAAITGEIIN  
>W2\_1580944  
EFNPNNNIVKLCQLGLDLEEKGLKEASGIFLRAWNEAADDFEKFLAAHYVTRYQKDVSDKWKWIETSLRLALEMDSYAKGVLS  
SLYLKARCFFESGDAGNAKKNYELAESFKHKLSDNGPFYHGTRADLQVGDLLTAGFRSNIYHSEVVMNHIFTAIVNGAELAAE  
LAKGDGRERVYVEPTGSFENDPNVTDKKFPGNPNTRSYRTREPLKIVGEVTDWVRLTSEQLQTWREKLANIEKAEIIN  
>W2\_456471  
TELDSPFYHGTKADLQVGDMLTAGFQSNYDDRVMMNHIFTALPKGAGLAAEMAKGDGKPRVYVVEPTGEFENDPNVTDK  
KFPNPNTRSYRSKHPLRIIGSLDSWEPDFPEFVQNLRSRVKAGLGEIIN  
>W2\_1294492  
EFTPTNPIIRRCIQGMALAAAGKPEEAGQLFLQAWNEATHDLEKFLAAHYVVARHQKNDSDRLHWLETALACALKNTESVKS  
YSMLYLNIAKCHEALGNSDEAKKNYALAASFQGTADQGPYFHGTADLEVDVLTAGGTSNYQPDLMNHIFTALAHGAG  
LAASLAKGEGRERVYVEPTGDFENDPNVTDKKFPGNPNTRSYRSRVPLKIVGELTEWARQTPPELQKFREKLANIQGGIIN  
>W2\_2321962  
NPNTTEKNNPGATPFAQTYFHGTADLKLGLDLEPGFNSNYGEQKNAKYIFLTATLDAATWGAELAFGEGRERIYLVEPTGPIE  
DDPDLTDKKFRGNPTKSYRSRHPFKVVEVTVWQGHPAQVQVLMKDHLLQQLHQQGIRSLNDE  
>W2\_1976254  
DQTPITNNASATPFAQTFHGTKAALNIGDLLQVGFNSNYAQYQNLHLYMTATLDAAIWGAELASGEGKERIYLVEPTGSIED  
DPNLTKKFPNPTMAYRTRQPLKVVGEVATWQGHTEQVKAMKDGLLKREGLDGIEN  
>W2\_2509215  
QNPKNLMQGNKNNQQLDNAGPTPFFQTFHGTADVKGGEISVGYYSNYGDRKNANYVFLTATLDAAIWGAELAVGNA  
GERIYLVEPTGLIEDDPDLTDKKFPGNPTKSYRSKHPLKVVGEVATWQSHPEQIEAMKEGLERLAKKGVTSLNE  
>W2\_436021  
TYAKDATPPFYHGTRADLHVGDLLAPGFASNYQEQLKSWIYFSGTLDAAIWGCELAKGDGPERIYVVEPTGAFEDDPNLTDKRF  
PGNPNTRSYRSRAPLRIVGEVTEWEPHPPERLEEMKDALARMEAEEDMKIIDWTTVDEGALNKCADDEWLYIEAWDES  
>W2\_982741  
EQNQSNTNACPKPFAQTYFHGTAALEIGDLLQVGFNSNYKESDHLNHVYMTATLDAAIWGAELASGDGRERIYLVEPTGTIE  
DDPNLTKKFPNPTMAYRSQHPLRVVGEVTLWQGHAEQIKAMKDGKGLAKLREQGLDTIEN  
>W2\_2284918  
SSDRGTNYMTFSTNNHIVKLCIQGMALAEENGKPGEASRFLQAWNEATNDHEKFFAAYLAQRQSNVADKWKWLETALQF  
ALHINDSDVKSFAHSLYSNIAKCYEELGDVDNAKKNHDKASSFKDNPSPDKGPFYHGTVLDLQVGDLLTAGFGSNYQSDLVMMH  
IYFTALVDGAGLAAALAKGDGRERVYVEPTGSFENDPNVTDKKFPGNPNTRSYRTQSPLKIIGEVDPDWIRTPTEEVKRWREKLAN  
NKGEIVN  
>W2\_928841  
EFDPNNNVVKLCIQGMNMEEKDRPEEASGLFLEAWNEAGSDFEKYLAAYVVARHQDDVHDLKWLKLETSLKFKINDVTVKS  
AFPSLYSKIADCCEDLNDSDNAKKNRELANSFTENLPDSDGPFYHGTRADLKVGDLLTAGFGSNYKSDLTMNHIFTALVNGAGL  
AAALAKGDGPERVYVEPTGRFENDPNVTDKKFPGNPNTRSYRSQSPLKIVGEVTNWARLTPEQLQWREKLANTKGEIIN  
>W2\_1056966  
ASSDDPTPTIYHGTADLAPGDQIAPGNRSNYGARKPATFVYLTATLDAATWGAELAVGDGRGRIYVVEPTGPIEDDPNLTDK  
KYPGNLRSYRTRDPLRVTEVADWQGHPEALQAMRDHLEHLRALGVEAIED  
>W2\_759404  
NPTSPSPFSQTFHGTADLKMGLIQPGYQSNYTAHEQLNHVYFTATLDAAIWGAELANGEGRIYVVEPTGEMEDDPNV  
TNKRFPNPNTRSYRSIQPVVVEVAVWQGHPEQVNGMKEALAKLREGRDTIEN  
>W2\_505284  
IEPGFSSNYGARKKAVWVYLTATLDAATWGAELALGEGRIYVVEPTGPIEDDPNLTDKKFPGNPNTRSYRSRHPLRVTEITD  
WEGHPPEAIAGMKAHLERLKLGEAIED  
>W2\_2302663  
TASDDGLPQQYHGTADLKPGLIAPGFSSNYGERKKAAYVYLTATLDAATWGAELAVGEGRIYVVEPTGPIQDDPNLTD

KRYPGNPTKSYRTRHPLRVTVGEVTDWQGHPPPEQLEAMRAHLEQLERLGIEAIED  
>W2\_1051501  
TATNDSNSETFYHGTADLKPGLIEPGYSSNYGARKKAFFVYLATLDAATWGAELAVGEGRGRIYIVEPTGPIEDDPNLTDKK  
FPGNPTKSYRTRDPLRVTVGEVLDWTGHSPEQLQTMKDHLERLKERLGIEAIED  
>W2\_1844246  
ETNRNENQSQARASDLSREIFYHGTADLKPGLIEPGFYNSYGRKKKANYVYLATLDAAVWGAELALGEGPGRYIIVEPTGP  
MEDDPNLTDKKYPGNPTKSYRSQSPLRITGEITDWQGHTEPQLNTMKEHLERLKERLGIEAIED  
>W2\_1355083  
ETNKSEDKSIESAYDLSSQAFYHGTKANLQKGLIEPGFNSYGRKKKAKYIYLATLDAAIWGAELAVGEGDGRYIIEPTGPFE  
DDPNLTDKKFPGNPTKSYRSLHPLHVIGEVTDWQGHSPQLNAMKEHLERLKERLGIEAIEE  
>W2\_1008891  
SDKPMAAIDDLSSQRFYHGTADLKPGLIEPGYNSYGRKKKAAVYVYLATLDAAAWGAELAVGEGRGRIYIVEPTGPIEDDP  
NLTDKKYPGNPTKSYRSRDPLRVTVGEVTDWQGHSPQLRAMKDHLDHLRQLGVEAIED  
>W2\_1930875\_wd3  
DKTADDARTAQPFFYHGTADLKPGLIAPGYASNYGARKKAFFVYLATLDAATWGAELAAGEGRGRIYIIVEPTGPIEDDPNL  
DKRFPNPTKSYRSRDPLRVTVGEVTDWQGHPPPEQLQAMREHLERLRAQGIEAIED  
>W2\_498816  
THDDLTSQQFHYHGTADLKPGLIEPGYNSYGRKKKASYVYLATLDAATWGAELAFGEGPGRYIIVEPTGPIEDDPNLTDKK  
YPGNPTKSYRTRDPLRVTVGEIVDWQGHPPPEQLKAMKDHLAQLERLGIEAIED  
>W2\_1851401  
TTDDLSPRYHGTADLRLPGDLIAAGYRSNYGERRKAAVYVYLATLDAATWGAELALGEGPGRYIIVEPTGPIEDDPNLTDKKY  
PGNPTKSYRTRDPLRVTVGEVADWPGHPPEQLQAMRDHLDRLESGIEAIED  
>W2\_1182683  
RSEPMGAIDDLDSQRFYHGTADLKPGEIMIGPGYNSYGRKKKAAVYVYLATLDAAVWGAELAVGEGPGRYIIVEPTGPIEDD  
PNLTDKKYPGNPTKSYRTRDPLRVTVGEITDWQGHSPQLKAMKDHLERLRLGIEAIED  
>W2\_317439\_wd1  
SDTMPPEGAPRLPPFYHGTADLKPGLIAPGFRSNGSRAAAVYVYLATLDAAVWGAELALGDGRERIYIIVEPTGPIEDDPN  
LTNAKYPGNPTQSYRTRDPLRVSGEVTSWQGHTEPQLREMREVMARMRRRGIEAIED  
>W2\_770591  
MTSENARSERFYHGTADLKPGLIAPGYTSNFGKRKKAAVYVYLATLDAATWGAELALGEGAGRIYIIVEPTGPIEDDPNLTDKK  
YPGNPTKSYRSRAPLRVTVGEITDWQGHSPALKAMKDHLAQLRRLGIEAIED  
>W2\_1428970\_wd2  
QTNKTENKSNEPSQSPFVQTFHGTADLKIGDFIEVGLNSYGRKNAKYIYLATLDAAIWGAELALGEGRERIYIIVEPTGPIE  
DDPNLTDKKFPGNPTKSYRSKHPFKVVEITIWQGHSPQVKAMNEGLAKLKEQGIEAIED  
>W2\_921462  
TDGPKPFVHESGALLHGTADLAIGDMLVPGYLANYGERRANHVYVETLDAAAWAAELAVGPGRGRIYIIVEPTGPLEDDP  
NLTDKKFPGNPTSYRTRAPVKVVGELVDWVGHSSEEQQAMRDGLADLERGLAIVEDD

**Table S2.** Protein sequence similarity between 45 newly identified *arr* genes and the genes in the complete genomes

| Arr gene name | Accession number | Species name                          | Sequence similarity (%) |
|---------------|------------------|---------------------------------------|-------------------------|
| W2_1488688    | WP_069949724.1   | <i>Arthrobacter sp. U41</i>           | 57.81                   |
| W2_1852679    | WP_084490216.1   | <i>Niabella ginsenosidivorans</i>     | 74.39                   |
| W2_2666971    | WP_084490216.1   | <i>Niabella ginsenosidivorans</i>     | 76.83                   |
| W2_399810     | WP_077133846.1   | <i>Spirosoma montaniterrae</i>        | 80.14                   |
| W2_931432     | WP_084490216.1   | <i>Niabella ginsenosidivorans</i>     | 75.20                   |
| W2_1076727    | WP_053195305.1   | <i>Herbaspirillum hiltneri</i>        | 82.35                   |
| W2_1252150    | WP_096357565.1   | <i>Mucilaginibacter gotjawali</i>     | 76.22                   |
| W2_493312     | WP_015132086.1   | <i>Calothrix sp. PCC 7507</i>         | 66.93                   |
| wd4           | WP_084490216.1   | <i>Niabella ginsenosidivorans</i>     | 75.61                   |
| W2_1524164    | WP_061991201.1   | <i>Flammeovirgaceae bacterium 311</i> | 56.59                   |
| W2_2157429    | WP_013239403.1   | <i>Clostridium ljungdahlii</i>        | 98.54                   |
| W2_1786964    | WP_048919688.1   | <i>Rufibacter sp. DG31D</i>           | 71.97                   |
| W2_1931402    | WP_077133846.1   | <i>Spirosoma montaniterrae</i>        | 73.79                   |
| W2_611506     | WP_061991201.1   | <i>Flammeovirgaceae bacterium 311</i> | 57.36                   |
| W2_2027090    | WP_011585690.1   | <i>Cytophaga hutchinsonii</i>         | 77.78                   |
| W2_1316525    | WP_077202317.1   | <i>Vibrio</i>                         | 78.83                   |
| W2_1614168    | WP_084490216.1   | <i>Niabella ginsenosidivorans</i>     | 78.46                   |
| W2_705194     | WP_077133846.1   | <i>Spirosoma montaniterrae</i>        | 74.45                   |
| W2_691914     | WP_066405829.1   | <i>Flavisolibacter tropicus</i>       | 81.89                   |
| W2_1580944    | WP_084490216.1   | <i>Niabella ginsenosidivorans</i>     | 71.66                   |
| W2_456471     | WP_069243308.1   | <i>Burkholderia latens</i>            | 81.25                   |
| W2_1294492    | WP_084490216.1   | <i>Niabella ginsenosidivorans</i>     | 67.07                   |
| W2_2321962    | WP_077133846.1   | <i>Spirosoma montaniterrae</i>        | 77.24                   |
| W2_1976254    | WP_080238844.1   | <i>Spirosoma rigui</i>                | 78.03                   |
| W2_2509215    | WP_013930076.1   | <i>Runella slithyformis</i>           | 66.89                   |
| W2_436021     | WP_075153047.1   | <i>Sphingomonas koreensis</i>         | 70.77                   |
| W2_982741     | WP_080238844.1   | <i>Spirosoma rigui</i>                | 79.70                   |
| W2_2284918    | WP_084490216.1   | <i>Niabella ginsenosidivorans</i>     | 72.06                   |
| W2_928841     | WP_084490216.1   | <i>Niabella ginsenosidivorans</i>     | 74.80                   |
| W2_1056966    | WP_015132086.1   | <i>Calothrix sp. PCC 7507</i>         | 73.72                   |
| W2_759404     | WP_080238844.1   | <i>Spirosoma rigui</i>                | 71.94                   |
| W2_505284     | WP_015175623.1   | <i>Oscillatoria nigro-viridis</i>     | 81.42                   |
| W2_2302663    | WP_015171984.1   | <i>Geitlerinema sp. PCC 7407</i>      | 80.88                   |
| W2_1051501    | WP_015171984.1   | <i>Geitlerinema sp. PCC 7407</i>      | 81.62                   |
| W2_1844246    | WP_015175623.1   | <i>Oscillatoria nigro-viridis</i>     | 82.27                   |
| W2_1355083    | WP_015175623.1   | <i>Oscillatoria nigro-viridis</i>     | 85.62                   |
| W2_1008891    | WP_015132086.1   | <i>Calothrix sp. PCC 7507</i>         | 84.29                   |
| Wd3           | WP_015171984.1   | <i>Geitlerinema sp. PCC 7407</i>      | 80.88                   |
| W2_498816     | WP_015171984.1   | <i>Geitlerinema sp. PCC 7407</i>      | 85.07                   |
| W2_1851401    | WP_015171984.1   | <i>Geitlerinema sp. PCC 7407</i>      | 82.84                   |
| W2_1182683    | WP_015171984.1   | <i>Geitlerinema sp. PCC 7407</i>      | 84.78                   |
| Wd1           | WP_015175623.1   | <i>Oscillatoria nigro-viridis</i>     | 74.80                   |
| W2_770591     | WP_015132086.1   | <i>Calothrix sp. PCC 7507</i>         | 84.56                   |
| Wd2           | WP_096357565.1   | <i>Mucilaginibacter gotjawali</i>     | 78.72                   |
| W2_921462     | WP_025433386.1   | <i>Rhodococcus</i>                    | 81.02                   |

**Table S3.** The list of nucleotide and amino acid sequences of four representative Arr-wd proteins involved in rifamycin-resistance

|         | nucleotide and amino acid sequence                                                                                                                                                                                                                                                                                                                                                                                                                                                                                                                                                                                                                                                                                                                                                         |
|---------|--------------------------------------------------------------------------------------------------------------------------------------------------------------------------------------------------------------------------------------------------------------------------------------------------------------------------------------------------------------------------------------------------------------------------------------------------------------------------------------------------------------------------------------------------------------------------------------------------------------------------------------------------------------------------------------------------------------------------------------------------------------------------------------------|
| arr-wd1 | AGCGATACGATGCCGCCGAGGGCGCCCGCGCTTGCCGCCGTTCTACACGGCACAAAGGCCGACCTG<br>AAGCCGGGAGACCTCATCGCGCCCGCTTCCGCTCCAACCTCGGCAGCGGACGCGCGGCCGCTACGTC<br>TACCTGACCGCTACGCTCGACGCGGCCGCTGCGGGCGCCGAACCTAGCCCTGGGGACGCGCCGAGCG<br>CATCTACGTCGTGGAGCCGACCGGGCCTATCGAGGACGACCCTAACCTGACCAACGCCAAGTATCCCGGC<br>AACCCGACGCGAGTCGTACCGCACGCGGACCCGCTCCGGGTCTCCGGCGAGGTGACTTCGTGGCAGGG<br>GCACACGCCCGAGCAGCTTCGGGAGATGCGGGAGATGGTCGCGCGGATGCGGCGGCGCGCATCGAG<br>GCCATCGAGGAC                                                                                                                                                                                                                                                                                                                                   |
| Arr-wd1 | SDTMPPEGAPRLPPFYHGTKADLKPGLIAPGFRSNFGSGRAAAVYVLTATLDAAVWGAELALGDGRERIYV<br>VEPTGPIEDDPNLNNAKYPGNPTQSYRTRDPLRVSGEVTSWQGHTEQLREMREVMRRRGIEAIEDLE<br>HHHHHH (149 aa, 16.6 kDa, $\epsilon_{280} = 19940 \text{ cm}^{-1}\text{M}^{-1}$ )                                                                                                                                                                                                                                                                                                                                                                                                                                                                                                                                                        |
| arr-wd2 | CAAATAACAAAAGTGAACAATAAATGAACCAAGTCAAAGCCCTTTGTTCAACTTTCTCCACG<br>GCACAAAAGGCTGATCTAAAGATTGGAGACTTTATTGAAGTTGGTCTTAACTCAAACACGGTCAAAGAAA<br>AAATGCGAAATATCTACCTGACAGCAACTTTGGATGCAGCTATTGGGGCGCTGAGCTTGCTCTGGGG<br>GAAGGACGCGAAAGAATCTATTTAGTAGAACCGACAGGGCAATTGAAGACGCCCAATTTAACTGATA<br>AAAAATCCCGGTAAATCAAACAAAATCTTATCGTTCAAACATCCGTTTAAAGTTGTCGCGGAGATTACT<br>ATTTGGCAAGGACACTCACCCGAACAAGTCAAAGCAATGAATGAGGGATTAGCAAACTTAAAGAACAA<br>GGTATTGAGGCAATAGAGGAT                                                                                                                                                                                                                                                                                                                           |
| Arr-wd2 | QTNKTENKSNEPSQSPFVQTFHGTAKDLKIGDFIEVGLNSNYGQRKNAKYIYLTATLDAAIWGAELALGEGR<br>ERILVEPTGPIEDDPNLTKKFPNPTKSYRSKHPFKVVEITIWQGHSPHEQVKAMNEGLAKLKEQIEAIED<br>LEHHHHHH (155 aa, 17.5 kDa, $18450 \text{ cm}^{-1}\text{M}^{-1}$ )                                                                                                                                                                                                                                                                                                                                                                                                                                                                                                                                                                   |
| arr-wd3 | GACAAGACCGCGATGATGCCGAACCGCGCAGCCGTTCTACACGGCACGAAGGCCGACCTGAAGCC<br>GGGCGACCTCATCGCGCCGGGCTACGCTCCAACCTACGGCGCGCGAAGAAAGCAGCCTTCGTCTACCT<br>CACGGCCACGCTCGACGCCGCCACCTGGGGCGCCGAGCTGGCCGCGGCGAGGGCCGCGCCGGATC<br>TACTTGGTGGAGCCGACGGGCCCATCGAGGACGACCCCAACCTCACGGACAAGCGGTTCCCGGGCAA<br>CCCCACGAAGTCGTATCGCTCGCGGGACCCGCTGCGGGTACGGGCGAGGTCACGGACTGGCAGGGGC<br>ACCCGACGAGCAGTTGCAGGCCATGCGGGAGCACCTGGAGCGCCTCCGCGCGCAGGGCATCGAGGC<br>GATCGAGGAC                                                                                                                                                                                                                                                                                                                                           |
| Arr-wd3 | DKTADDARTAQPFYHGTKADLKPGLIAPGYASNYGARKKAAFVYLTATLDAATWGAELAAGEGRGRIYV<br>PTGPIEDDPNLTKRFPNPTKSYRSRDLRVTEVTDWQGHPEQLQAMREHLERLRAQIEAIEDLEHH<br>HHHH (147 aa, 16.4 kDa, $19940 \text{ cm}^{-1}\text{M}^{-1}$ )                                                                                                                                                                                                                                                                                                                                                                                                                                                                                                                                                                               |
| arr-wd4 | GAATTTAGCCGAACAATAATGTTGTCAAACCTGTCTTCAAGGTATGGAGTTGGAAGAGAAAGGAAA<br>GCCTGAAGAAGCGAGCGAAATATTTCTTCAAGCGTGAACGAAGCGGCTGACGATTTGAAAAATTTA<br>CTGCCGTTATTATGTGGCGCGTCATCAAACGATACTGCCGACAAATTAATGGCTGGAACGGTTT<br>TGGAGTTCGGATTAAGATCAATGACGACACGGTTAAGTCGGCTTTTCCCGCTTTGTATCAAAACCTTG<br>CCAAATGCTTTGAGGATTTAGGCGATGCCCGCAACCGGAAAAAGAATTATGAATTAGCAAATTCATTCA<br>AGAAAAACCGTCCGACAAAGTCTTTTTATCACGGAACGCGAGCGGATTTGCAAATCGGCGATTTG<br>CTGACCGCCGAGGCAAGTCTAATTACAAGCCGAACCTCGTAATGAATCACATTTACTTTACGGCATTG<br>GTGAACGGCGCGGGACTTGCCTCGGCTTTGGCTAACGGCGACGGACGCGAGCGGGTTTATATAGTCG<br>AACCGACGGGGAGTTTTGAAAATGATCCGAATGTGACGGACAAAAATTTCCGGGCAATCCGACACGC<br>TCATATCGCAGTCAAGCACCTTTGAAAATCGTCGGCGAAGTAACAGATTGGGTGAGAATAACGCCTGA<br>GGAATCCAAAAATGGCGGGAAAAGTTGGCGAACAGCAAAGGAGAAATTATTAAT |
| Arr-wd4 | EFSPNNNVKLCQMELEEKGPKEEASEIFLQAWNAAADDFEKFAGYVVARHQNDADKLKWLTVLEF<br>GLKINDDTVKSAPFALYQNLAKCFEDLGDARNKKNYELANSFKKPSDKGPFYHGTRADLQIGDLLTAGGKS<br>NYKAEVLMNHIFTALVNGAGLAAALANGDGRERVYVEPTGSFENDPNVTDKFKPNPTRSYRSQAPLKIV<br>GEVTDWVRITPEELQKWREKLANSKGEIINLEHHHHHH (254 aa, 28.6 kDa, $35410 \text{ cm}^{-1}\text{M}^{-1}$ )                                                                                                                                                                                                                                                                                                                                                                                                                                                                  |



**Table S4.** Primer sequences used for the current work

| template protein | mutations                             | sequences                                                                                                    |
|------------------|---------------------------------------|--------------------------------------------------------------------------------------------------------------|
| Arr-wd3          | N34H<br>(Arr-wd3+N34H)                | 5'-G GGC TAT GCA AGC <u>CAT</u> TAT GGT GCA CG-3'<br>5'-C GTG CAC CATA <u>ATG</u> GCT TGC ATA GCC C-3'       |
| Arr-wd3          | H125M<br>(Arr-wd3+H125M)              | 5'-GCA ATG CGC GAA <u>ATG</u> CTG GAA CGC CTG-3'<br>5'-CAG GCG TTC CAG <u>CAT</u> TTC GCG CAT TGC-3'         |
| Arr-wd3          | H125G<br>(Arr-wd3+H125G)              | 5'-CAA TGC GCG AA <u>GGC</u> CTG GAA CGC CTG-3'<br>5'-CA GGC GTT CCA <u>GGC</u> CTT CGC GCA TTG-3'           |
| Arr-wd3          | H125K<br>(Arr-wd3+H125K)              | 5'-GCA ATG CGC GAA <u>AAA</u> CTG GAA CGC CTG-3'<br>5'-CAG GCG TTC CAG <u>TTT</u> TTC GCG CAT TGC-3'         |
| Arr-wd3          | H142 to stop codon<br>(Arr-wd3+Δ6His) | 5'-GAA GCA ATT GAA GAT <u>TAA</u> GAG CAC CAC CAC-3'<br>5'-GTG GTG GTG CTC <u>TTA</u> ATC TTC AAT TGC TTC-3' |

**Table S5.** ADP-ribosylated product analysis by ESI-MS in negative mode

| substrate   | Product*               | calculated m/z      | detected m/z |
|-------------|------------------------|---------------------|--------------|
| rifampin    | ADP-ribosylrifampin    | $[M+H]^- = 1362.5$  | 1362.8       |
|             |                        | $[M+Na]^- = 1384.5$ | 1385.0       |
| rifapentine | ADP-ribosylrifapentine | $[M+H]^- = 1416.5$  | 1416.8       |
| rifaximin   | ADP-ribosylrifaximin   | $[M+H]^- = 1325.4$  | 1325.8       |
| rifabutin   | ADP-ribosylrifabutin   | $[M+H]^- = 1386.5$  | 1386.8       |
|             |                        | $[M+Na]^- = 1408.5$ | 1408.9       |

\*The ADP-ribosylated product includes a phosphate group, which makes the molecule to exhibit -2 charge by itself.

**Table S6.** Steady-state kinetic parameters of Arr-wd proteins in ADP-ribosylation of rifampin and its analogues

(a) NAD<sup>+</sup>

|                                                         | Arr-wd1  | Arr-wd2 | Arr-wd3  | Arr-wd4  |
|---------------------------------------------------------|----------|---------|----------|----------|
| $k_{\text{cat}}$ (s <sup>-1</sup> )                     | 0.023(3) | 0.14(2) | 0.027(2) | 0.108(9) |
| $K_M$ (mM)                                              | 0.4(2)   | 2.3(6)  | 0.11(4)  | 0.8 (2)  |
| $k_{\text{cat}}/K_M$ (s <sup>-1</sup> M <sup>-1</sup> ) | 65(9)    | 61(11)  | 246(19)  | 139(12)  |

(b) rifampin

|                                                         | Arr-wd1  | Arr-wd2  | Arr-wd3   | Arr-wd4  |
|---------------------------------------------------------|----------|----------|-----------|----------|
| $k_{\text{cat}}$ (s <sup>-1</sup> )                     | 0.010(2) | 0.056(3) | 0.0206(2) | 0.060(3) |
| $K_M$ (mM)                                              | 0.23(19) | 0.48(7)  | 0.18(6)   | 0.17(8)  |
| $k_{\text{cat}}/K_M$ (s <sup>-1</sup> M <sup>-1</sup> ) | 45(8)    | 118(6)   | 113(8)    | 357(37)  |

(c) rifapentine

|                                                         | Arr-wd1  | Arr-wd2  | Arr-wd3  | Arr-wd4  |
|---------------------------------------------------------|----------|----------|----------|----------|
| $k_{\text{cat}}$ (s <sup>-1</sup> )                     | 0.014(1) | 0.031(1) | 0.010(1) | 0.045(3) |
| $K_M$ (mM)                                              | 0.11(5)  | 0.13(3)  | 0.07(5)  | 0.11(4)  |
| $k_{\text{cat}}/K_M$ (s <sup>-1</sup> M <sup>-1</sup> ) | 128(12)  | 245(10)  | 147(17)  | 419(30)  |

(d) rifaximin

|                                                         | Arr-wd1   | Arr-wd2   | Arr-wd3   | Arr-wd4  |
|---------------------------------------------------------|-----------|-----------|-----------|----------|
| $k_{\text{cat}}$ (s <sup>-1</sup> )                     | 0.0047(4) | 0.0165(2) | 0.0028(4) | 0.086(7) |
| $K_M$ (mM)                                              | 0.11(6)   | 0.03(0)   | 0.13(10)  | 0.28(8)  |
| $k_{\text{cat}}/K_M$ (s <sup>-1</sup> M <sup>-1</sup> ) | 41(4)     | 533(8)    | 22(3)     | 304(23)  |

(e) rifabutin

|                                                         | Arr-wd1  | Arr-wd2  | Arr-wd3  | Arr-wd4  |
|---------------------------------------------------------|----------|----------|----------|----------|
| $k_{\text{cat}}$ (s <sup>-1</sup> )                     | 0.010(1) | 0.033(1) | 0.013(2) | 0.063(6) |
| $K_M$ (mM)                                              | 0.17(10) | 0.24(3)  | 0.22(10) | 0.27(9)  |
| $k_{\text{cat}}/K_M$ (s <sup>-1</sup> M <sup>-1</sup> ) | 60(8)    | 142(6)   | 58(7)    | 230(21)  |

**Table S7.** Substrate dissociation constants ( $K_D$ ) measured from the intrinsic fluorescence quenching(a) NAD<sup>+</sup> and NADP<sup>+</sup>

| $K_D$ (mM)    | NAD <sup>+</sup> | NADP <sup>+</sup> |
|---------------|------------------|-------------------|
| Arr-wd1       | 1.23(4)          | 2.3(1)            |
| Arr-wd2       | 2.14(5)          | 2.33(7)           |
| Arr-wd3       | 1.67(6)          | 1.89(8)           |
| Arr-wd4       | 1.75(7)          | 1.90(6)           |
| Arr-wd3+Δ6His | 1.53(4)          | 2.03(8)           |
| Arr-wd3+N34H  | 2.08(3)          | 2.07(5)           |
| Arr-wd3+H125M | 1.39(1)          | 2.5(1)            |
| Arr-wd3+H125G | 1.48(5)          | 2.1 (1)           |
| Arr-wd3+H125K | 1.23(4)          | 2.54(1)           |

(b) rifampin analogues

| $K_D$ (μM)    | rifampin | rifapentine | rifaximin | rifabutin |
|---------------|----------|-------------|-----------|-----------|
| Arr-wd1       | 12.8(4)  | 22.5(8)     | 8.6(2)    | 7.8(1)    |
| Arr-wd2       | 3.5(1)   | 5.4(2)      | 5.1(2)    | 5.1(2)    |
| Arr-wd3       | 25.4(4)  | 30.6(4)     | 36.2(9)   | 34.0(14)  |
| Arr-wd4       | 1.2(1)   | 1.7(1)      | 1.4(1)    | 1.9(1)    |
| Arr-wd3+Δ6His | 12.7(1)  | 19.4(4)     | 20.5(6)   | 20.1(4)   |
| Arr-wd3+N34H  | 7.1(1)   | 10.1(1)     | 5.1(1)    | 7.2(1)    |
| Arr-wd3+H125M | 8.9(3)   | 13.1(1)     | 7.0(2)    | 6.9(2)    |
| Arr-wd3+H125G | 5.9(2)   | 9.5(1)      | 6.3(2)    | 8.0(2)    |
| Arr-wd3+H125K | 12.8(5)  | 20.6(6)     | 11.1(1)   | 18.1(5)   |

**Table S8.** Steady-state kinetic parameters of Arr-wd3 variants in ADP-ribosylation of rifampin analogues

(a) NAD<sup>+</sup>

| variants | $k_{\text{cat}}$ (s <sup>-1</sup> ) | $K_{\text{M}}$ (mM) | $k_{\text{cat}}/K_{\text{M}}$ (s <sup>-1</sup> M <sup>-1</sup> ) |
|----------|-------------------------------------|---------------------|------------------------------------------------------------------|
| Arr-wd3  | 0.027(2)                            | 0.11(4)             | 246(19)                                                          |
| + N34H   | 0.012(1)                            | 0.3(1)              | 39(4)                                                            |
| + H125M  | 0.016(2)                            | 0.20(12)            | 81(12)                                                           |
| + H125G  | 0.018(3)                            | 0.84(30)            | 21(3)                                                            |
| + H125K  | 0.024(2)                            | 0.41(10)            | 57(5)                                                            |

(b) rifampin

| variants | $k_{\text{cat}}$ (s <sup>-1</sup> ) | $K_{\text{M}}$ (mM) | $k_{\text{cat}}/K_{\text{M}}$ (s <sup>-1</sup> M <sup>-1</sup> ) |
|----------|-------------------------------------|---------------------|------------------------------------------------------------------|
| Arr-wd3  | 0.0206(2)                           | 0.18(6)             | 113(8)                                                           |
| + N34H   | 0.0077(2)                           | 0.011(5)            | 702(15)                                                          |
| + H125M  | 0.026(1)                            | 0.06(2)             | 417(21)                                                          |
| + H125G  | 0.018(1)                            | 0.09(4)             | 207(16)                                                          |
| + H125K  | 0.0143(5)                           | 0.06(1)             | 227(7)                                                           |

(c) rifapentine

| variants | $k_{\text{cat}}$ (s <sup>-1</sup> ) | $K_{\text{M}}$ (mM) | $k_{\text{cat}}/K_{\text{M}}$ (s <sup>-1</sup> M <sup>-1</sup> ) |
|----------|-------------------------------------|---------------------|------------------------------------------------------------------|
| Arr-wd3  | 0.010(1)                            | 0.07(5)             | 147(17)                                                          |
| + H125M  | 0.0214(10)                          | 0.05(2)             | 409(19)                                                          |
| + H125G  | 0.018(1)                            | 0.08(3)             | 229(14)                                                          |
| + H125K  | 0.0180(6)                           | 0.06(1)             | 305(9)                                                           |

(d) rifaximin

| variants | $k_{\text{cat}}$ (s <sup>-1</sup> ) | $K_{\text{M}}$ (mM) | $k_{\text{cat}}/K_{\text{M}}$ (s <sup>-1</sup> M <sup>-1</sup> ) |
|----------|-------------------------------------|---------------------|------------------------------------------------------------------|
| Arr-wd3  | 0.0028(4)                           | 0.13(10)            | 22(3)                                                            |
| + H125M  | 0.0238(9)                           | 0.09(2)             | 277(11)                                                          |
| + H125G  | 0.0240(9)                           | 0.07(2)             | 354(13)                                                          |
| + H125K  | 0.0205(6)                           | 0.10(1)             | 204(6)                                                           |

(e) rifabutin

| variants | $k_{\text{cat}}$ (s <sup>-1</sup> ) | $K_{\text{M}}$ (mM) | $k_{\text{cat}}/K_{\text{M}}$ (s <sup>-1</sup> M <sup>-1</sup> ) |
|----------|-------------------------------------|---------------------|------------------------------------------------------------------|
| Arr-wd3  | 0.013(2)                            | 0.22(10)            | 58(7)                                                            |
| + H125M  | 0.0138(6)                           | 0.05(2)             | 288(13)                                                          |
| + H125G  | 0.0226(7)                           | 0.09(2)             | 249(8)                                                           |
| + H125K  | 0.0154(2)                           | 0.06(1)             | 241(3)                                                           |

**Table S9.** Determination of minimum inhibitory concentration (MIC) of rifampin and its analogues

(a) MIC values from the literatures (1).

| plasmids                 | IPTG | rifampin | rifaximin | rifabutin |
|--------------------------|------|----------|-----------|-----------|
| pET28a(+)                | -    | 4        | 8         | 8         |
|                          | +    | 8        | 16        | 8         |
| pET28a(+)-arr-2          | -    | 512      | >512      | >512      |
|                          | +    | >512     | >512      | >512      |
| pET22b(+)                | -    | 8        | 16        | 16        |
|                          | +    | 8        | 16        | 16        |
| pET22b(+)-arr- <i>ms</i> | -    | 128      | >512      | 64        |
|                          | +    | >512     | >512      | >512      |
| pET15b(+)                | -    | 8        | 16        | 16        |
|                          | +    | 8        | 16        | 16        |
| pET15b(+)-arr- <i>sc</i> | -    | 128      | >512      | 64        |
|                          | +    | 512      | 512       | 512       |

(b) Measured MIC values in this study

| plasmids                | IPTG | rifampin | rifapentine | rifaximin | rifabutin |
|-------------------------|------|----------|-------------|-----------|-----------|
| pET22b(+)               | -    | 4        | 4           | 4         | 4         |
|                         | +    | 2        | 4           | 4         | 4         |
| pET22b(+)-arr-wd1       | -    | 4        | 4           | 4         | 4         |
|                         | +    | 32       | 64          | 512       | 64        |
| pET22b(+)-arr-wd2       | -    | 32       | 64          | 256       | 32        |
|                         | +    | 512      | >512        | >512      | 256       |
| pET22b(+)-arr-wd3       | -    | 8        | 8           | 16        | 16        |
|                         | +    | 64       | 128         | 512       | 128       |
| pET22b(+)-arr-wd4       | -    | 8        | 16          | 32        | 8         |
|                         | +    | 128      | 256         | >512      | 256       |
| pET22b(+)-arr-wd3+N43H  | -    | 8        | 8           | 16        | 8         |
|                         | +    | 32       | 64          | >512      | 128       |
| pET22b(+)-arr-wd3+H125M | -    | 8        | 8           | 16        | 8         |
|                         | +    | 32       | 64          | 512       | 128       |
| pET22b(+)-arr-wd3+H125G | -    | 16       | 8           | 64        | 16        |
|                         | +    | 64       | 128         | >512      | 128       |
| pET22b(+)-arr-wd3+H125K | -    | 8        | 16          | 16        | 8         |
|                         | +    | 16       | 32          | 512       | 64        |

**Figure S1.** Structural analysis of Arr-*ms* protein complexed with rifampin (2HW2.pdb). (a) Annotated secondary structure information and rifampin binding loop (b) 2D diagram of rifampin-Arr-*ms* interaction (color scheme: pink and purple: hydrophobic interaction, green: van der Waals contact, lightblue: hydrogen bond, orange: cation-pi interaction) (c) Water mediated hydrogen bonds between rifampin and Arr-*ms*

**Figure S2.** Autodock simulation of NAD<sup>+</sup>-binding site in Arr-*ms*

**Figure S3.** Protein purification and characterization of Arr-wd proteins. (a) A representative FPLC trace of Arr-wd1 protein (b) 15% SDS-PAGE of Arr-wd proteins and the single variants (c) A representative MADLI-TOF spectra of Arr-wd1 protein

**Figure S4.** A representative HPLC analysis of steady-state activity assay by the (a) previously reported HPLC method and by the (b) modified quenching method (c) The standard curve of nicotinamide (d-e) Michaelis-Menten kinetic analysis under various concentrations of (d) NAD<sup>+</sup> or (e) rifampin

**Figure S5.** Intrinsic fluorescence changes upon the addition of either NAD<sup>+</sup> or rifampin. (a) Relative location of the tryptophan residues in Arr-*ms* (PDB 2HW2) (b) UV-Vis spectra of rifampin and NAD<sup>+</sup>. Rifampin exhibits strong absorption at 295 and 325 nm. (c) Representative intrinsic fluorescence quenching upon the addition of rifampin. The fluorescence intensity was corrected for the secondary filter effect with rifampin as shown in (b). (d) Plots of  $F_0/F$  vs the concentration of rifampin. (e) Dissociation constant ( $K_D$ ) determined by the fluorescence changes **Figure S6.** Rifampin analogues used for the current study

**Figure S7.** Representative HPLC traces of the reactions with rifampin analogues. (a) rifapentine (b) rifaximin (c) rifabutin

**Figure S8.** MIC values of Arr-wd proteins. (a) Arr-wd 1-4 proteins (b) Arr-wd3 variants

**Figure S1.** Structural analysis of Arr-*ms* protein complexed with rifampin (2HW2.pdb). (a) Annotated secondary structure information and rifampin binding loop (b) 2D diagram of rifampin-Arr-*ms* interaction (color scheme: pink and purple: hydrophobic interaction, green: van der Waals contact, lightblue: hydrogen bond, orange: cation-pi interaction) (c) Water mediated hydrogen bonds between rifampin and Arr-*ms*.

(a)

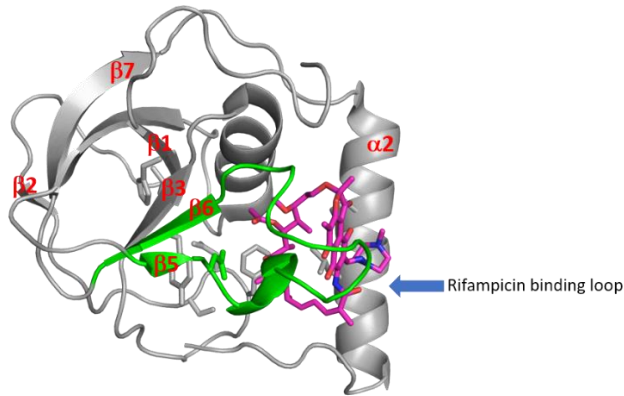

(b)

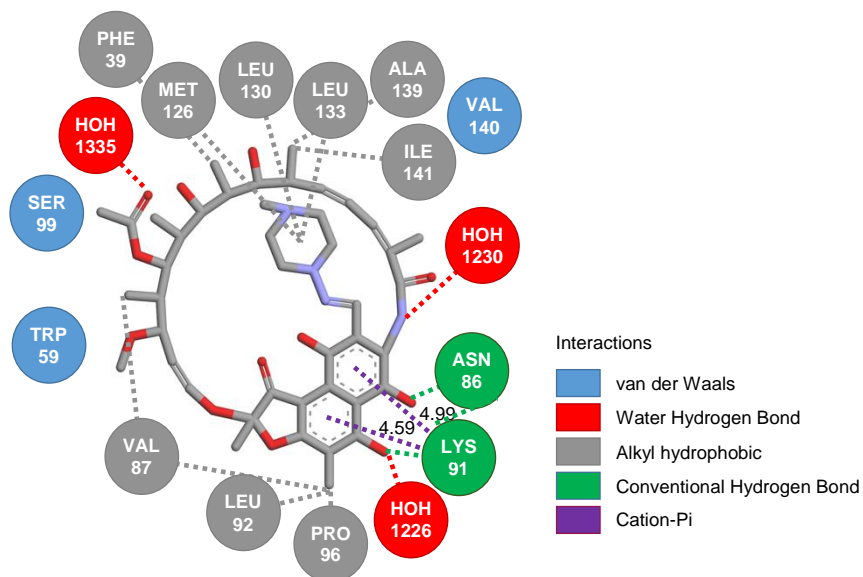

(c)

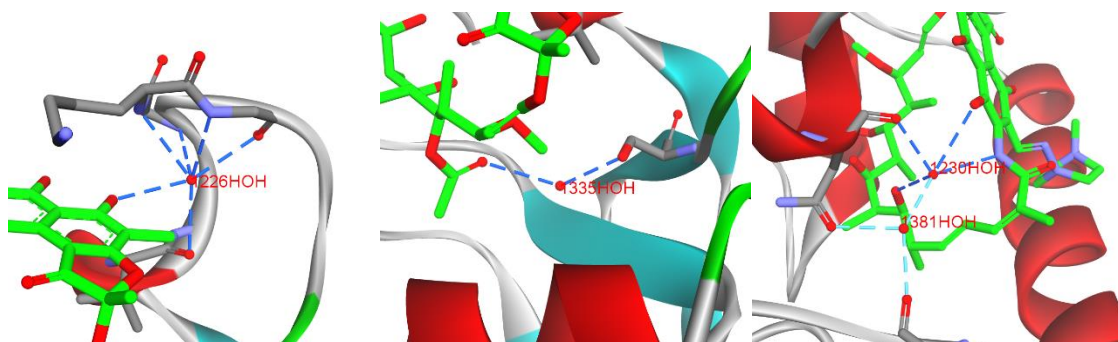



**Figure S2.** Autodock simulation of NAD<sup>+</sup>-binding site in Arr-*ms*. The black arrows indicate the scissile C-N bond in NAD<sup>+</sup> that generates an oxocarbenium ion in accordance with the release of nicotinamide.

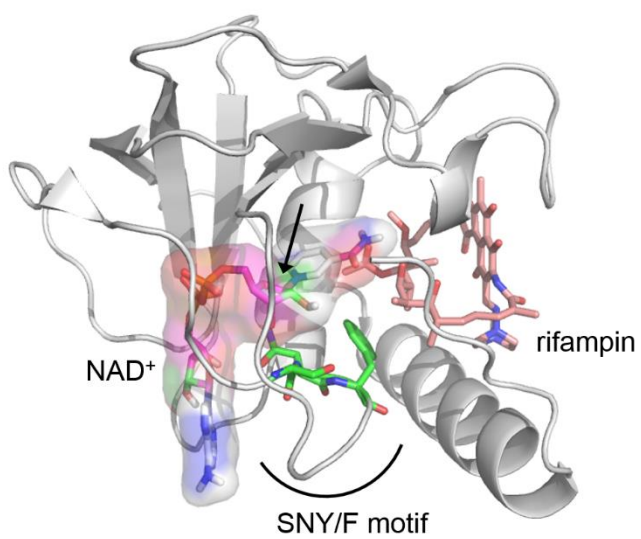

**Figure S3.** Protein purification and characterization of Arr-wd proteins. (a) A representative FPLC trace of Arr-wd1 protein (b) 15% SDS-PAGE of Arr-wd proteins and the single variants (c) A representative MADLI-TOF spectra of Arr-wd1 protein.

(a)

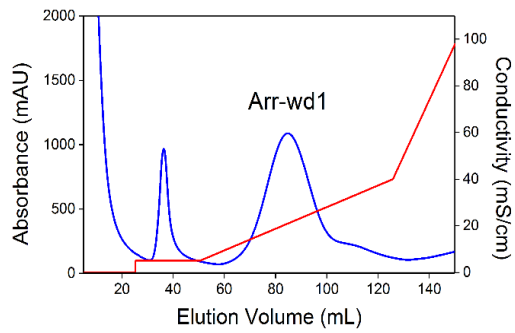

(b)

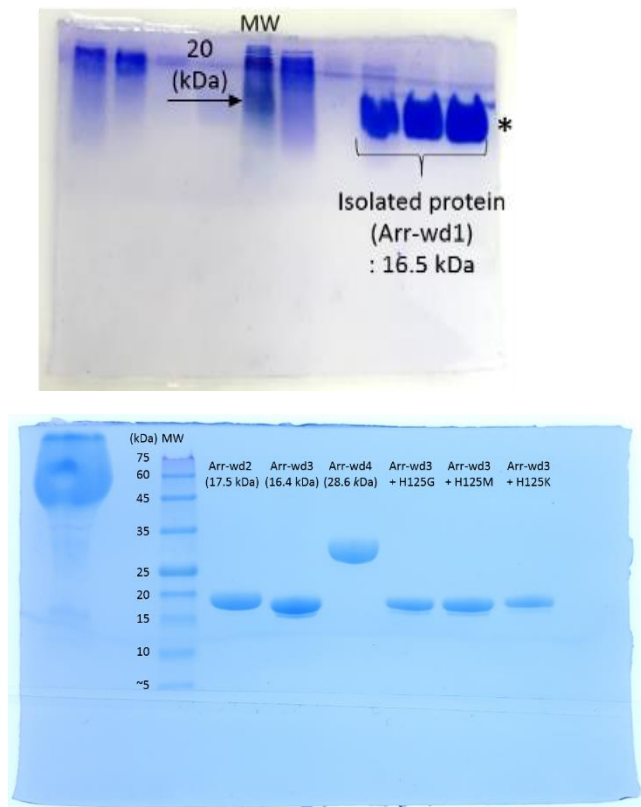

(c)

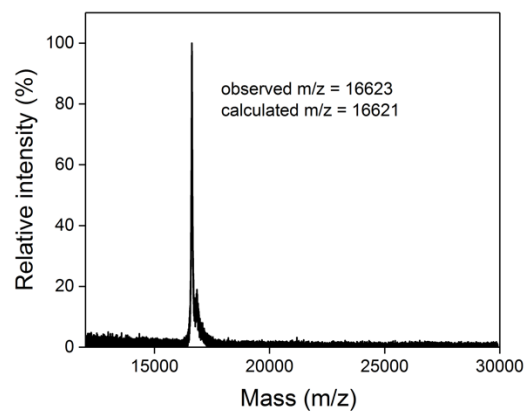

**Figure S4.** A representative HPLC analysis of steady-state activity assay. (a) Previously reported HPLC method (b) Modified quenching method by increasing the volume of methanol from 100  $\mu\text{L}$  to 400  $\mu\text{L}$ . (c) The standard curve of nicotinamide by the modified HPLC method (d-e) Michaelis-Menten kinetic analysis under various concentrations of (d)  $\text{NAD}^+$  or (e) rifampin.

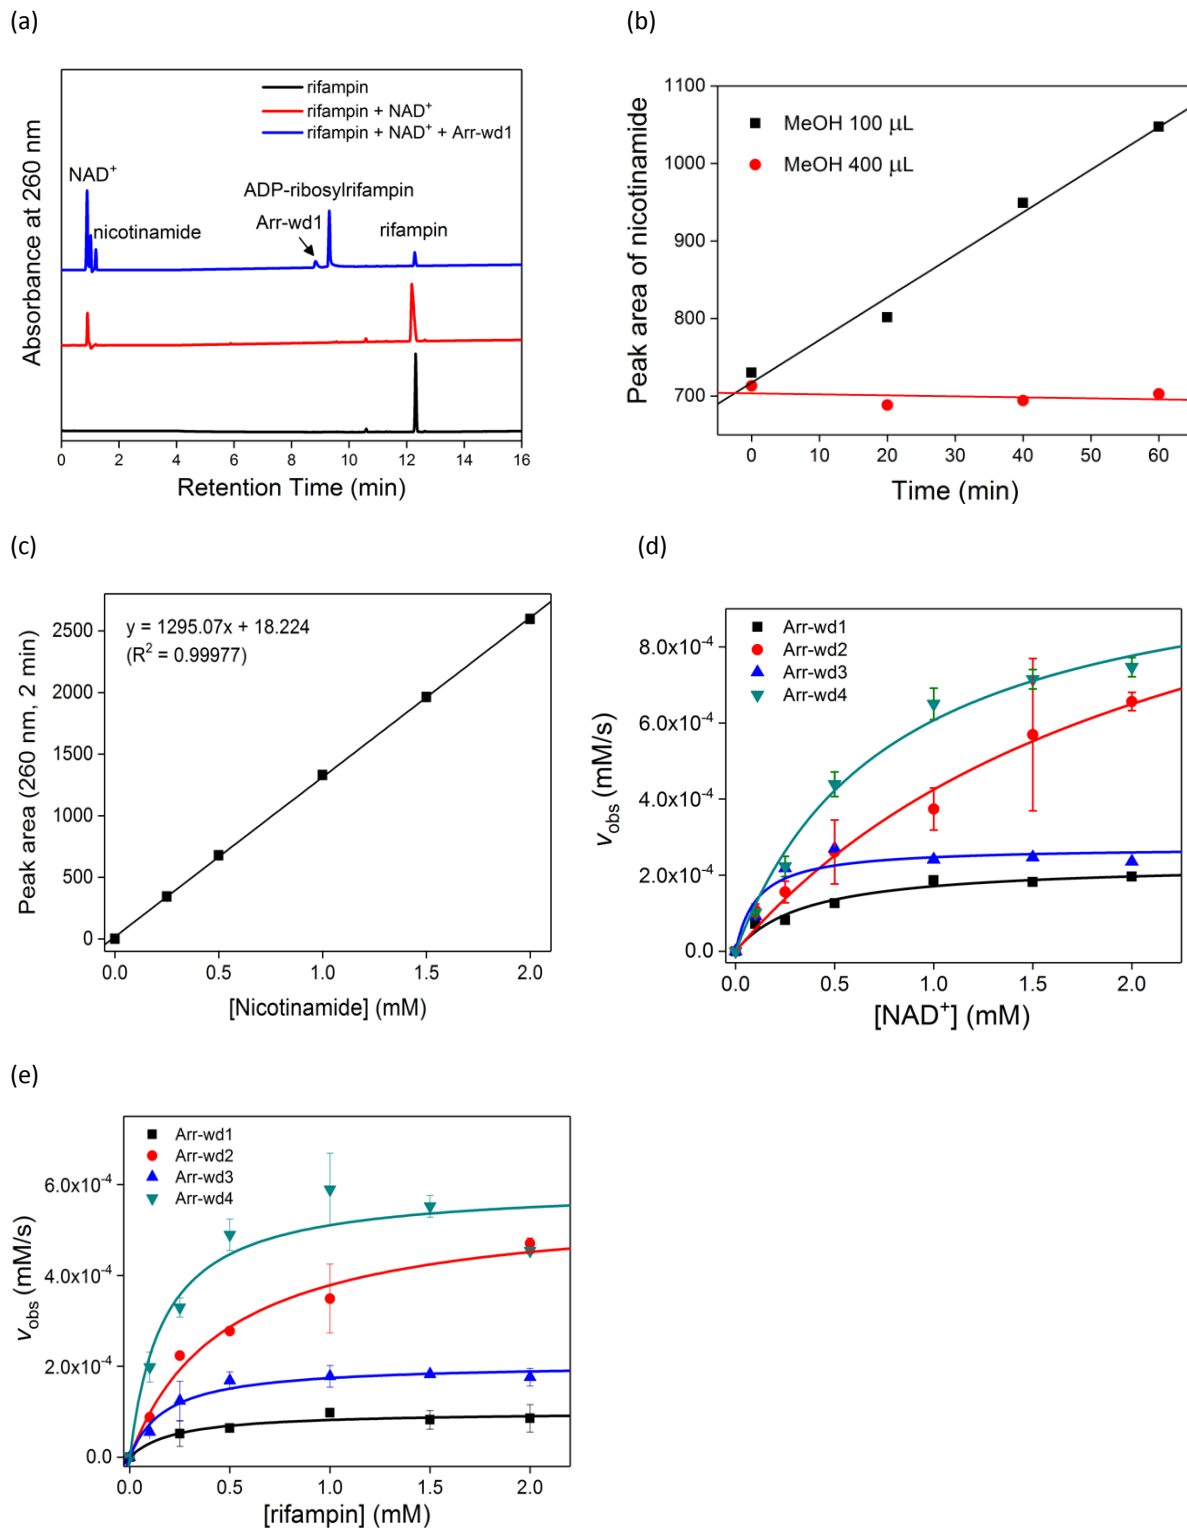

**Figure S5.** Intrinsic fluorescence changes upon the addition of either NAD<sup>+</sup> or rifampin. (a) Relative location of the tryptophan residues in Arr-ms (PDB 2HW2) (b) UV-Vis spectra of rifampin and NAD<sup>+</sup>. Rifampin exhibits strong absorption at 295 and 325 nm. (c) Representative intrinsic fluorescence quenching upon the addition of rifampin. The fluorescence intensity was corrected for the secondary filter effect with rifampin as shown in (b). (d) Plots of  $F_0/F$  vs the concentration of rifampin. (e) Dissociation constant ( $K_D$ ) determined by the fluorescence changes (a)

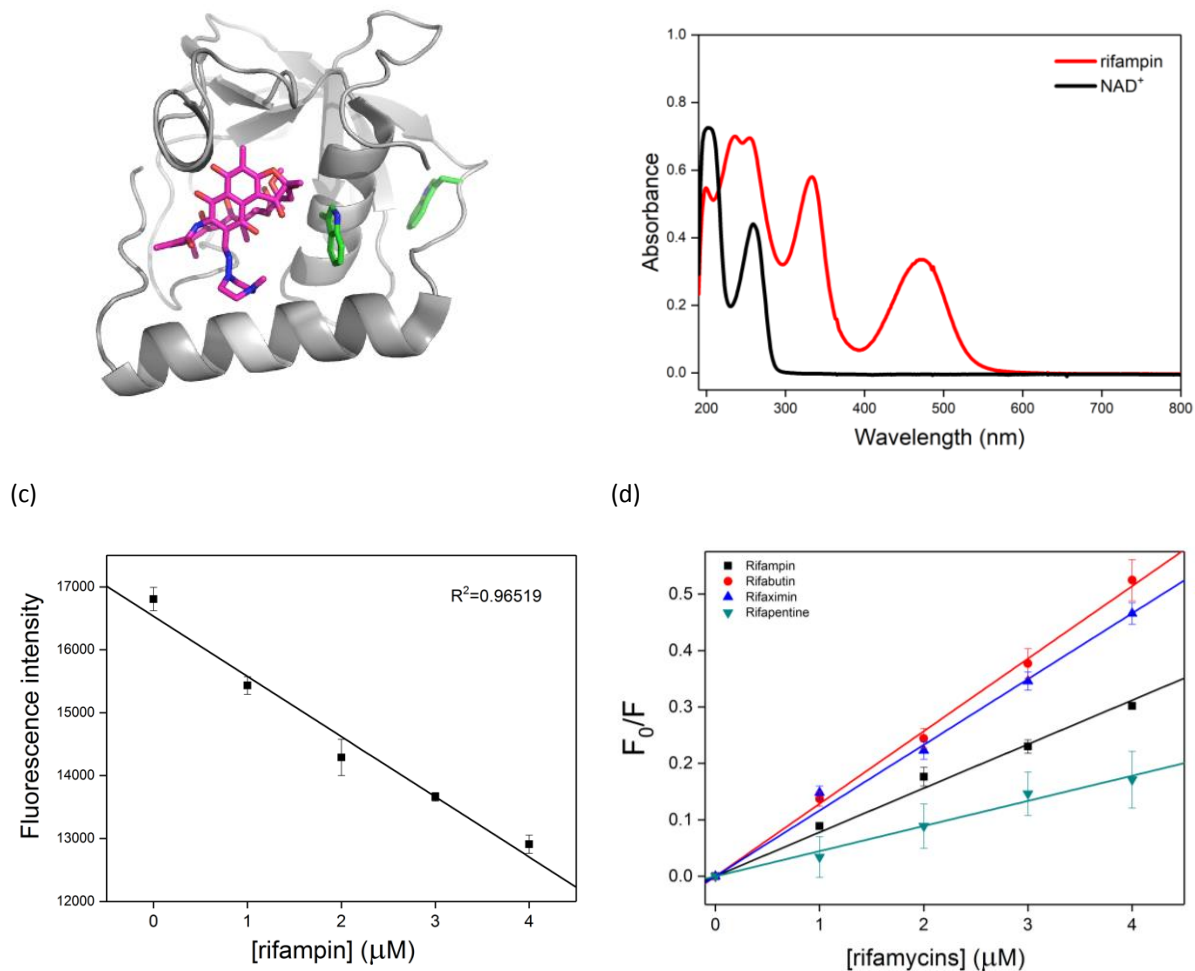

**Figure S6.** Rifampin analogues used for the current study. Altered substructures of the rifampin derivatives are colored in red, and the hydroxyl group that reacts with an oxocarbenium ion is colored in blue.

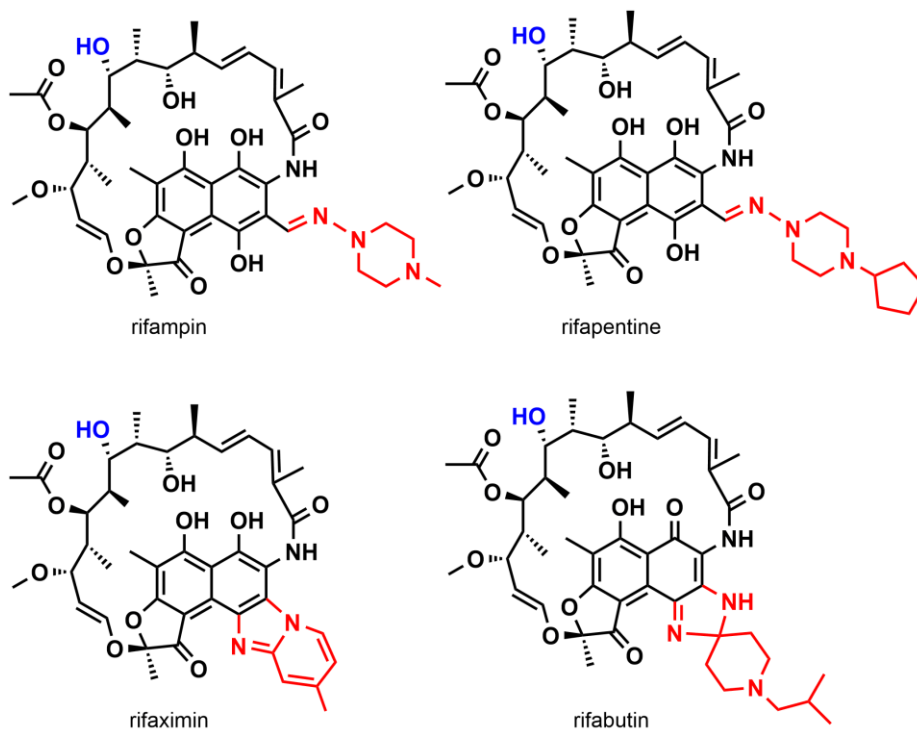

**Figure S7.** Representative HPLC traces of the reactions with rifampin analogues. (a) rifapentine (b) rifaximin (c) rifabutin.

(a)

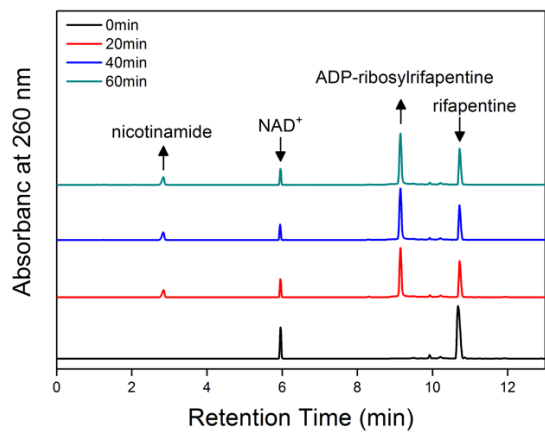

(b)

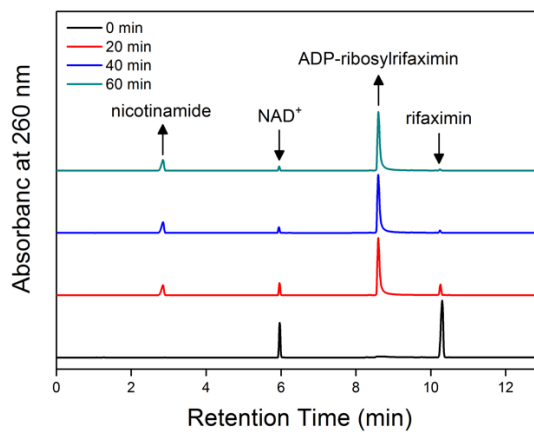

(c)

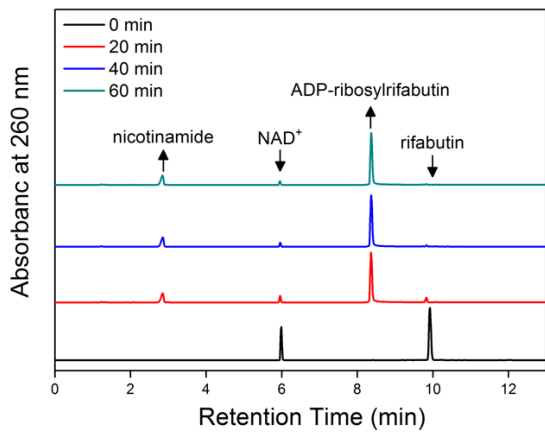

**Figure S8.** MIC values of Arr-wd proteins. (a) Arr-wd 1-4 proteins (b) Arr-wd3 variants.

(a)

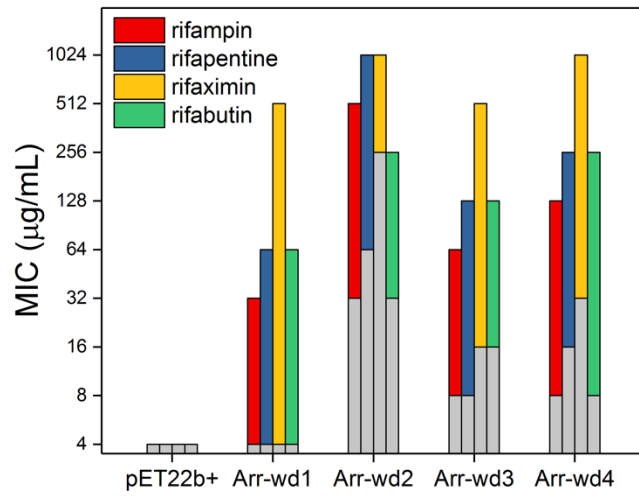

(b)

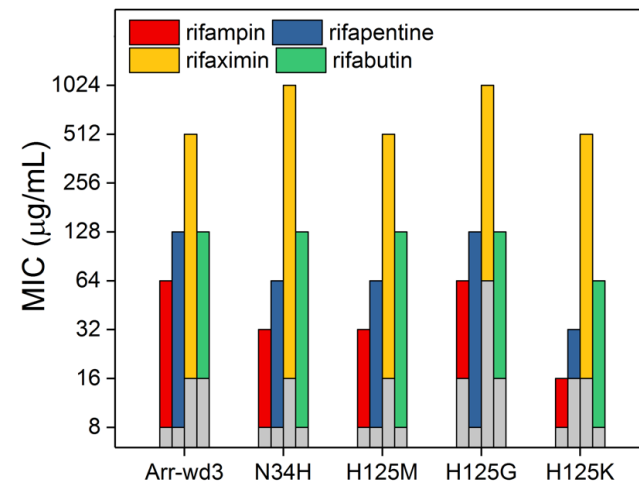



## References

1. Baysarowich, J., Koteva, K., Hughes, D.W., Ejim, L., Griffiths, E., Zhang, K., Junop, M. and Wright, G.D. (2008) Rifamycin antibiotic resistance by ADP-ribosylation: Structure and diversity of Arr. *Proc. Natl. Acad. Sci. U.S.A.*, **105**, 4886-4891.
